# Supplementary material
Source: PubMed Central journal article supplement (PMC3754473)
Supplement: supp_140.18.3731_DEV096560.pdf [file supp_140.18.3731_DEV096560.pdf]

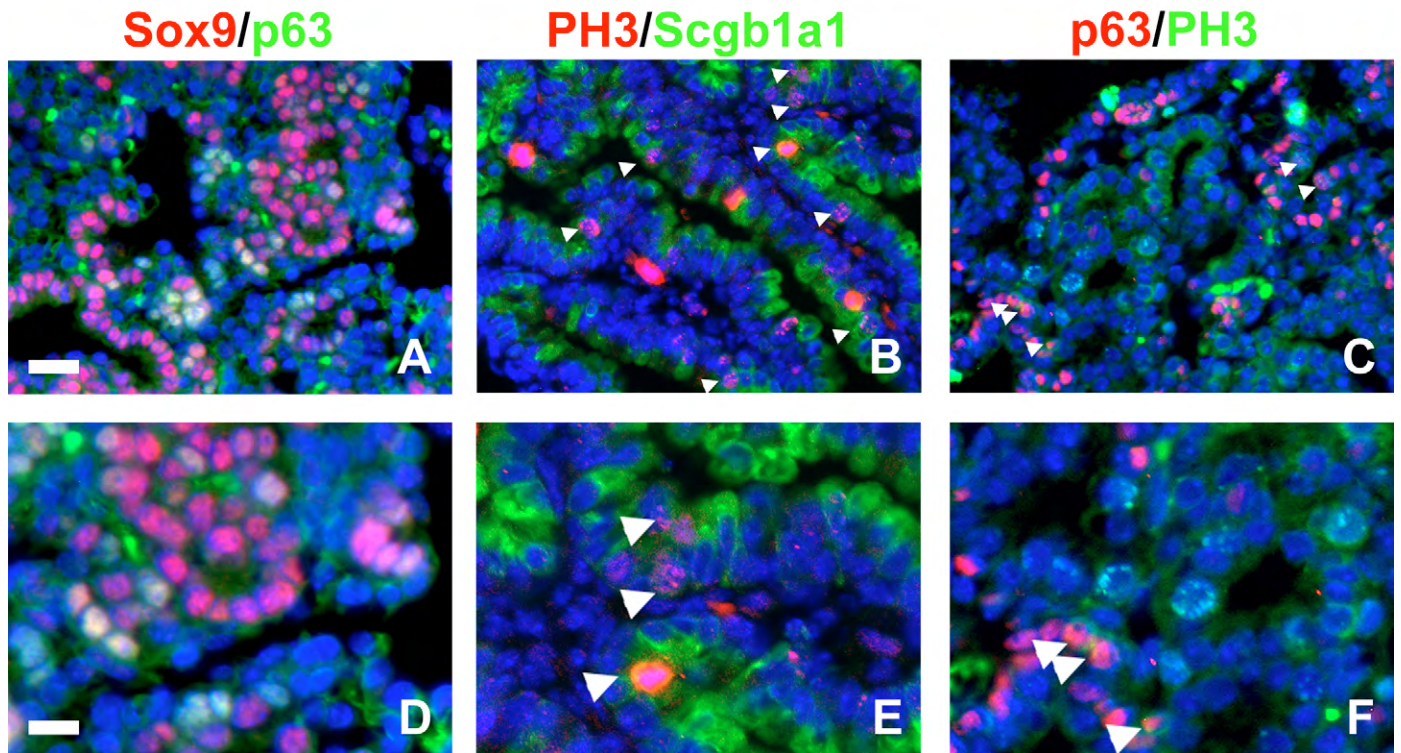

**Fig. S1. Fgf10 overexpression induces p63 expression in a subset of Sox9-positive cells and proliferation of Clara and basal cells.** (A,D) Immunostaining for Sox9 and p63 on E18.5 *Rosa26-rtTA;Tet-Fgf10* lungs induced from E13.5 onwards. (B,E) Immunostaining for phospho-histone H3 (proliferation marker) and Scgb1a1 on E18.5 *Rosa26-rtTA;Tet-Fgf10* lungs induced from E13.5 onwards. (C,F) Immunostaining for phospho-histone H3 (proliferation marker) and p63 on E18.5 *Rosa26-rtTA;Tet-Fgf10* lungs induced from E13.5 onwards. D-F show higher magnifications of A-C, respectively. Arrowheads point to proliferating cells.  $n \geq 3$ . Scale bars: 25  $\mu\text{m}$  (A-C); 12.5  $\mu\text{m}$  (D-F).
